# Supplementary material
Source: publisher site journal article supplement (https://www.dovepress.com/article/372312)
Supplement: Supplementary file 1 [file get_supplementary_file.php]

Table S1: Adverse Reactions Reported after Enrolment

| Study | Redness (n,4) | Others*  (n=10) |
| --- | --- | --- |
| Wong (n=51)14 | 1(2.0%) | 1(2.0%) |
| Tumbocon (n=73)13 13 | 2(2.7%) | 0 |
| Lim (n=28)16 | 1(3.7%) | 4(14.8%) |
| Park (n=37)17 | 0 | 2(5.4%) |
| Yen (n=17)18 | 0 | 3(15%) |

*itching, burning, inflammation, dizziness, blurred vision
